# Supplementary material for: A small molecule that binds Hedgehog and blocks its signaling in human cells
Source: Springer Nature journal article supplement (doi:10.1038/nchembio.142), 2009-01-18
Supplement: 41589_2009_BFnchembio142_MOESM3_ESM.mol [file 41589_2009_BFnchembio142_MOESM3_ESM.mol]

  ChemDraw01080915392D

 32 34  0  0  0  0  0  0  0  0999 V2000
   -0.3572    3.9188    0.0000 C   0  0  0  0  0  0  0  0  0  0  0  0
   -0.3572    3.0938    0.0000 O   0  0  0  0  0  0  0  0  0  0  0  0
    0.3572    2.6812    0.0000 O   0  0  0  0  0  0  0  0  0  0  0  0
    1.0717    3.0938    0.0000 C   0  0  0  0  0  0  0  0  0  0  0  0
    1.0717    3.9188    0.0000 C   0  0  0  0  0  0  0  0  0  0  0  0
    0.3572    4.3312    0.0000 C   0  0  0  0  0  0  0  0  0  0  0  0
   -1.0717    2.6812    0.0000 C   0  0  0  0  0  0  0  0  0  0  0  0
   -1.0717    1.8563    0.0000 C   0  0  0  0  0  0  0  0  0  0  0  0
   -0.3572    1.4438    0.0000 N   0  0  0  0  0  0  0  0  0  0  0  0
    0.3572    1.8563    0.0000 C   0  0  0  0  0  0  0  0  0  0  0  0
    1.0717    1.4438    0.0000 C   0  0  0  0  0  0  0  0  0  0  0  0
    1.7862    1.8563    0.0000 C   0  0  0  0  0  0  0  0  0  0  0  0
    1.7862    2.6812    0.0000 C   0  0  0  0  0  0  0  0  0  0  0  0
   -1.7862    3.0938    0.0000 C   0  0  0  0  0  0  0  0  0  0  0  0
   -1.7862    3.9188    0.0000 C   0  0  0  0  0  0  0  0  0  0  0  0
   -2.5006    4.3312    0.0000 C   0  0  0  0  0  0  0  0  0  0  0  0
   -3.2151    3.9188    0.0000 C   0  0  0  0  0  0  0  0  0  0  0  0
   -3.2151    3.0938    0.0000 C   0  0  0  0  0  0  0  0  0  0  0  0
   -2.5006    2.6812    0.0000 C   0  0  0  0  0  0  0  0  0  0  0  0
   -1.0717    4.3312    0.0000 O   0  0  0  0  0  0  0  0  0  0  0  0
    1.0717    0.6188    0.0000 C   0  0  0  0  0  0  0  0  0  0  0  0
    1.7862    0.2062    0.0000 C   0  0  0  0  0  0  0  0  0  0  0  0
    2.5006    0.6188    0.0000 O   0  0  0  0  0  0  0  0  0  0  0  0
    1.7862   -0.6188    0.0000 N   0  0  0  0  0  0  0  0  0  0  0  0
    2.5006   -1.0313    0.0000 C   0  0  0  0  0  0  0  0  0  0  0  0
    2.5006   -1.8563    0.0000 C   0  0  0  0  0  0  0  0  0  0  0  0
    1.7862   -2.2687    0.0000 C   0  0  0  0  0  0  0  0  0  0  0  0
    1.7862   -3.0938    0.0000 C   0  0  0  0  0  0  0  0  0  0  0  0
    2.5006   -3.5063    0.0000 C   0  0  0  0  0  0  0  0  0  0  0  0
    3.2151   -3.0938    0.0000 C   0  0  0  0  0  0  0  0  0  0  0  0
    3.2151   -2.2687    0.0000 C   0  0  0  0  0  0  0  0  0  0  0  0
    2.5006   -4.3312    0.0000 Cl  0  0  0  0  0  0  0  0  0  0  0  0
  1  2  1  0      
  4  5  1  0      
  5  6  1  0      
  6  1  1  0      
  2  7  1  0      
  7  8  1  0      
  8  9  1  0      
  9 10  1  0      
 10  3  2  0      
 10 11  1  0      
 11 12  1  0      
 12 13  1  0      
 13  4  2  0      
 14 15  2  0      
 15 16  1  0      
 16 17  2  0      
 17 18  1  0      
 18 19  2  0      
 19 14  1  0      
  1 20  2  0      
 21 22  1  0      
 22 23  2  0      
 22 24  1  0      
 24 25  1  0      
 25 26  1  0      
 26 27  2  0      
 27 28  1  0      
 28 29  2  0      
 29 30  1  0      
 30 31  2  0      
 31 26  1  0      
 29 32  1  0      
  7 14  1  1      
 11 21  1  1      
M  END
