# Supplementary material for: A small molecule that binds Hedgehog and blocks its signaling in human cells
Source: Springer Nature journal article supplement (doi:10.1038/nchembio.142), 2009-01-18
Supplement: 41589_2009_BFnchembio142_MOESM15_ESM.mol [file 41589_2009_BFnchembio142_MOESM15_ESM.mol]

  ChemDraw01080915392D

 32 35  0  0  0  0  0  0  0  0999 V2000
   -0.7145   -0.8250    0.0000 N   0  0  0  0  0  0  0  0  0  0  0  0
   -0.7145   -1.6500    0.0000 C   0  0  0  0  0  0  0  0  0  0  0  0
    0.0000   -2.0625    0.0000 C   0  0  0  0  0  0  0  0  0  0  0  0
    0.7145   -1.6500    0.0000 C   0  0  0  0  0  0  0  0  0  0  0  0
    0.7145   -0.8250    0.0000 N   0  0  0  0  0  0  0  0  0  0  0  0
    0.0000   -0.4125    0.0000 C   0  0  0  0  0  0  0  0  0  0  0  0
    1.4289   -0.4125    0.0000 C   0  0  0  0  0  0  0  0  0  0  0  0
   -1.4289   -0.4125    0.0000 C   0  0  0  0  0  0  0  0  0  0  0  0
    2.1434   -0.8250    0.0000 C   0  0  0  0  0  0  0  0  0  0  0  0
   -2.1434   -0.8250    0.0000 C   0  0  0  0  0  0  0  0  0  0  0  0
    2.1434   -1.6500    0.0000 C   0  0  0  0  0  0  0  0  0  0  0  0
    2.8579   -2.0625    0.0000 C   0  0  0  0  0  0  0  0  0  0  0  0
    3.5724   -1.6500    0.0000 C   0  0  0  0  0  0  0  0  0  0  0  0
    3.5724   -0.8250    0.0000 C   0  0  0  0  0  0  0  0  0  0  0  0
    2.8579   -0.4125    0.0000 C   0  0  0  0  0  0  0  0  0  0  0  0
   -2.8579   -0.4125    0.0000 C   0  0  0  0  0  0  0  0  0  0  0  0
   -3.5724   -0.8250    0.0000 C   0  0  0  0  0  0  0  0  0  0  0  0
   -3.5724   -1.6500    0.0000 C   0  0  0  0  0  0  0  0  0  0  0  0
   -2.8579   -2.0625    0.0000 C   0  0  0  0  0  0  0  0  0  0  0  0
   -2.1434   -1.6500    0.0000 C   0  0  0  0  0  0  0  0  0  0  0  0
    0.0000    0.4125    0.0000 C   0  0  0  0  0  0  0  0  0  0  0  0
    2.8579    0.4125    0.0000 N   0  0  0  0  0  0  0  0  0  0  0  0
    2.1434    0.8250    0.0000 C   0  0  0  0  0  0  0  0  0  0  0  0
   -2.8579    0.4125    0.0000 N   0  0  0  0  0  0  0  0  0  0  0  0
   -2.1434    0.8250    0.0000 C   0  0  0  0  0  0  0  0  0  0  0  0
   -3.5724    0.8250    0.0000 C   0  0  0  0  0  0  0  0  0  0  0  0
    3.5724    0.8250    0.0000 C   0  0  0  0  0  0  0  0  0  0  0  0
    0.7145    0.8250    0.0000 C   0  0  0  0  0  0  0  0  0  0  0  0
    0.7145    1.6500    0.0000 C   0  0  0  0  0  0  0  0  0  0  0  0
    0.0000    2.0625    0.0000 N   0  0  0  0  0  0  0  0  0  0  0  0
   -0.7145    1.6500    0.0000 C   0  0  0  0  0  0  0  0  0  0  0  0
   -0.7145    0.8250    0.0000 C   0  0  0  0  0  0  0  0  0  0  0  0
  1  2  1  0      
  2  3  1  0      
  3  4  1  0      
  4  5  1  0      
  5  6  1  0      
  6  1  1  0      
  5  7  1  0      
  1  8  1  0      
  7  9  1  0      
  8 10  1  0      
  9 11  2  0      
 11 12  1  0      
 12 13  2  0      
 13 14  1  0      
 14 15  2  0      
 15  9  1  0      
 10 16  2  0      
 16 17  1  0      
 17 18  2  0      
 18 19  1  0      
 19 20  2  0      
 20 10  1  0      
  6 21  1  0      
 15 22  1  0      
 22 23  1  0      
 16 24  1  0      
 24 25  1  0      
 24 26  1  0      
 22 27  1  0      
 21 28  2  0      
 28 29  1  0      
 29 30  2  0      
 30 31  1  0      
 31 32  2  0      
 32 21  1  0      
M  END
